# Supplementary material
Source: publisher figshare collection journal article supplement (https://rs.figshare.com/ndownloader/files/15615035)
Supplement: Supplementary file 1 [file 15615035]

**Table S1. AICc scores for various thermal performance models fitting P:R data to temperature**. Lowest scores are shown in bold

|  | *Acropora digitifera* | *Galaxea fascicularis* | *Montipora caliculata* | *Porites lobata* | *Oulastrea crispata* |
| --- | --- | --- | --- | --- | --- |
| Gaussian | **454.7219** | 379.4599 | **389.6607** | 309.8697 | 355.0773 |
| Mod Gaussian | 502.9549 | 435.4924 | 433.4081 | 502.8718 | 438.3732 |
| Weibull | 457.1834 | **377.5251** | 390.7898 | 312.13 | 356.9766 |
| Log Normal | 456.6224 | 389.1189 | 390.8923 | 310.9733 | 356.6348 |
| Linear | 470.2711 | 423.1685 | 397.2319 | **308.3138** | **354.7371** |
